# Supplementary material
Source: Research Square preprint supplement (doi:10.21203/rs.3.rs-9844672/v1)
Supplement: Supplementary file 1 [file 06af4a959f2d07d60933da52.xlsx]

## Sheet: Sheet1
				HS-Cas sol 5.2
				ANIm (%)	ANIb (%)	DDH in (%)
			B. pacificus EB422T	99.96	99.94	99.35
			B. paranthracis Mn5T	96.04	95.23	65.23
			B. tropicus N24T	95.14	94.42	60.2
			B. anthracis A0488T	94.42	93.63	55.6
