# Supplementary material
Source: Research Square preprint supplement (doi:10.21203/rs.3.rs-9844672/v1)
Supplement: Supplementary file 2 [file 2b99c43367b9439935a780e0.xlsx]

## Sheet: Hoja1
		Inoculum 5 ml
	Microorganism	Halo diameter (mm)	Colony diameter (mm)	PAR (mm)
	Paenibacillus polymixa	21	10	11
	Bacillus halotolerans	38	36	2
	Bacillus thuringiensis	27	13	14
	Bacillus velezensis	31	28	3
	Bacillus amyloliquefaciens	28	14	14
	Pseudomonas fluorescens	21	13	8
	Bacillus pacificus	28	13	15
	Pseudomonas fluorescens	21	9	12
	Bacillus megaterium	0	0	0
