# Supplementary material
Source: Research Square preprint supplement (doi:10.21203/rs.3.rs-9844672/v1)
Supplement: Supplementary file 3 [file b6a0850b50f78e9fc4d51be7.xlsx]

## Sheet: Table s1
		lytHBamHIForward	gcgggatccatgcttcgaaaaatttctcttttgct
		lytHXbaIReverse	gcgtctagattatcgttttgtattcgcgcgttc
		VprBamHIForward	gcgggatccttatttcacatctaaatcaacat
		VprBglIIreverse	ccgagatctatgaaaaaaactacatctaca
		YsdCBamHIForward	gcgggatccatgacaaaattagacgagacattg
		YsdCXbaIReverse	gcgtctagattaattaaatgtaatgttatgtactg
		nprBBamHIForward	gcgggatccatgtcctctttttttgagtg
		nprBXbaIReverse	gcgtctagattacacctactgcatcataagct
		aprEBamHIForward	cgggatccatgagaagcaaaaaattgtggat
		aprEBXbaIReverse	gctctagattattgtgcagctgcttgtac

## Sheet: Table S2
			Halo diameter (mm)	Colony diameter (mm)	Radio action (mm)
		Microorganism
		Paenibacillus polymixa	15	7	4
		Bacillus halotolerans	23	15	4
		Bacillus thuringiensis	30	14	8
		Bacillus oceanisediminis	NO	-	-
		Bacillus simplex	NO	-	-
		Bacillus velezensis	26	11	7,5
		Bacillus amyloliquefaciens	31	15	8
		Pseudomonas fluorescens	21	10	5,5
		Bacillus licheniformis	NO
		Bacillus pacificus	34	14	10
		Pseudomonas fluorescens	23	12	5,5
		Pseudomonas fluorescens	NO	-	-
		Bacillus megaterium	NO	-	-

## Sheet: Table s3
		Peptidases	kDa
		Signal peptidase IB	21.7
		Signal peptidase I W	20.47
		Type 4 prepilin-like proteins leader peptide-processing enzyme	27.13
		Methionine aminopeptidase	27.05
		Putative carboxypeptidase YodJ	29.37
		ATP-dependent Clp protease proteolytic subunit	21.2
		Signal peptidase I P	20.25
		Pyrrolidone-carboxylate peptidase	23.67
		Signal peptidase IB	20.59
		ATP-dependent protease subunit HslV	19.44
		Methionine aminopeptidase 2	28.92
		Signal peptidase I S	20.42
		Methionine aminopeptidase 1	27.53
		ATP-dependent Clp protease proteolytic subunit	21.42
		ATP-dependent Clp protease proteolytic subunit	21.41
		Membrane-embedded CAAX protease MroQ	26.44
		Putative zinc protease	47.06
		Peptidase T	45.92
		Serine protease Do-like HtrB	43.9
		D-aminopeptidase	42.61
		Gamma-D-glutamyl-L-lysine dipeptidyl-peptidase	37.28
		D-alanyl-D-alanine carboxypeptidase DacA	46.64
		D-alanyl-D-alanine carboxypeptidase DacB	31.18
		L-Ala--D-Glu endopeptidase	37.33
		Cysteine protease StiP	42.13
		Putative aminopeptidase YsdC	38.88
		Extracellular metalloprotease	36.36
		Aminopeptidase 2	45.32
		Aminopeptidase PepS	41.81
		Putative aminopeptidase YsdC	39.17
		Proline iminopeptidase	31.69
		D-alanyl-D-alanine carboxypeptidase	32.85
		Protease HtpX	49.09
		D-aminopeptidase	38.37
		Sporulation-specific protease YabG	33
		D-alanyl-D-alanine carboxypeptidase DacA	48.17
		D-alanyl-D-alanine carboxypeptidase DacB	48
		Putative murein peptide carboxypeptidase	33.29
		Xaa-Pro aminopeptidase	48.8
		D-alanyl-D-alanine carboxypeptidase DacA	34.91
		Intracellular serine protease	34.03
		Proline iminopeptidase	33.63
		D-alanyl-D-alanine carboxypeptidase DacA	48.49
		Putative aminopeptidase YsdC	39.57
		Aminopeptidase YpdF	38.6
		SpoIVB peptidase	47.03
		Peptidase T	39.58
		D-alanyl-D-alanine carboxypeptidase DacF	43.98
		Sporulation sigma-E factor-processing peptidase	34.62
		Aminopeptidase YpdF	40.05
		Putative peptidase	40.64
		ATP-dependent Clp protease ATP-binding subunit ClpX	46.21
		Germination protease	40.34
		Oligoendopeptidase F	70.31
		Beta-barrel assembly-enhancing protease	163.89
		D-aminopeptidase	54.76
		Cytosol non-specific dipeptidase	54.5
		Peptidoglycan D,D-transpeptidase FtsI	65.67
		Lon protease 2	61.59
		Lon protease 1	86.49
		Minor extracellular protease vpr	98.85
		ATP-dependent protease ATPase subunit ClpY	52.18
		Xaa-Pro dipeptidyl-peptidase	66.19
		Oligoendopeptidase F	69.21
		Aminopeptidase YwaD	50.46
		Peptidoglycan DL-endopeptidase CwlO	56.96
		Carboxy-terminal processing protease CtpB	54.19
		Neutral protease B	65.3
		Cytosol aminopeptidase	53.52
		Putative dipeptidase	51.25
		Dipeptidyl-peptidase 5	74.26
		ATP-dependent zinc metalloprotease FtsH	70.1

## Sheet: Table s4
			β-gal	Arginina dihydrolase	Citrate	Urease	Acetoin production	Gelatinase	Fermentation/oxidation (glucose)	Glycerol	D-Ribose	D-Xylose	D-galactose	D-glucose	D-fructose	D-Mannose	Methyl-a-D-glucopyranoside	N-Acetylglucosamine	Amygdalin	Arbutin	Aesculin ferric citrate	Salicin	Cellobiose	Sucrose	Trehalose	Starch	Glycogen	Turanose	Potassium gluconate	DNA G+C content (mol%)
		HS Cas 5.2									+	+		+	+			+			+			+	+					35.2
		B. pacificus EB422	+		+		+	+			+	+		+	+			+		+	+			+	+					35.2
		B.cereus ATCC 14579	+		+		+	+			+			+	+			+	+	+	+	+	+	+	+	+	+			35.2
		B. paranthracis Mn5	+		+		+	+			+			+	+			+			+			+	+					35.2
		B. tropicus N24	+		+		+	+		+	+				+						+	+	+		+	+	+		+	35.2
		B. anthracis ATCC 14578	+		+		+	+			+			+	+			+			+			+	+	+	+			35.2

## Sheet: Table 1
		Inoculum 5 ml
	Microorganism	Halo diameter (mm)	Colony diameter (mm)	PAR (mm)
	Paenibacillus polymixa	21	10	11
	Bacillus halotolerans	38	36	2
	Bacillus thuringiensis	27	13	14
	Bacillus velezensis	31	28	3
	Bacillus amyloliquefaciens	28	14	14
	Pseudomonas fluorescens	21	13	8
	Bacillus pacificus	28	13	15
	Pseudomonas fluorescens	21	9	12
	Bacillus megaterium	0	0	0
